# Supplementary material
Source: PubMed Central journal article supplement (PMC2757799)
Supplement: 0906146106_0906146106SI.pdf [file 0906146106_0906146106SI.pdf]

# Supporting Information

Yin et al. 10.1073/pnas.0906146106

## SI Discussion

**Protein Flexibility.** Our method is based on the surface features from a static structure. Therefore, surface flexibility is not addressed in this study. When the method is used to predict protein function based on surface similarity, some true positives may be missed during the search (false-negatives). How to efficiently model protein flexibility is still an open question in computational biology. One possible solution is to reduce the requirement of geometric match and incorporate physicochemical information from the surface into the fingerprints. Alternatively, starting from the unbounded structure, multiple simulations can be performed near the interface so that a set of the most preferable side-chain conformations can be explored. We will pursue these directions in future studies.

**Alternative Surface Generation and Representation.** The MSMS program (1) was used to generate the dot molecular surface

(Connolly surface). We at first tried the University California San Francisco DMS program (<http://www.cgl.ucsf.edu/Overview/software.html#dms>) for dot surface generation; however, the DMS program does not distribute points uniformly on the protein surface. This resulted in the generated distribution of surface dots being irregular and not reliably representing the topology of the surface.

Additional ways exist to represent the protein surface: for example, the method based on 3D cubic grids (2). The advantage of the cubic grid is that it is easy to implement and fast to calculate. However, the surface dots will not be evenly distributed in the surface manifold. In addition, the normal vectors from each protein surface point are not well defined. For the method we adopted, we rely on the surface normal vectors to calculate the curvatures, and require relatively uniform and smooth surface features. Therefore, the dot molecular surface is a better choice.

1. Sanner MF, Olson AJ, Spehner JC (1996) Reduced surface: An efficient way to compute molecular surfaces. *Biopolymers* 38:305–320.
2. Katchalskikatzir E, et al. (1992) Molecular-surface recognition—determination of geometric fit between proteins and their ligands by correlation techniques. *Proc Natl Acad Sci USA* 89:2195–2199.



Table S1. List of the top 50 hits from screening of alpha-chymotrypsin inhibitors

| PDB ID | Chain ID | EPSS score | Protein name annotation                                                 |
|--------|----------|------------|-------------------------------------------------------------------------|
| 1acb   | I        | 0          | EGLIN C                                                                 |
| 1cho   | I        | 47.7699    | TURKEY OVOMUCOID THIRD DOMAIN (OMTKY3)                                  |
| 1p2n   | B        | 69.7841    | PANCREATIC TRYPsin INHIBITOR                                            |
| 2 sec  | I        | 71.2629    | EGLIN C                                                                 |
| 1cbw   | D        | 71.6864    | PANCREATIC TRYPsin INHIBITOR, BPTI                                      |
| 1mtn   | D        | 71.776     | ASIC PANCREATIC TRYPsin INHIBITOR                                       |
| 1cse   | I        | 79.6658    | EGLIN C                                                                 |
| 1tec   | I        | 83.7011    | EGLIN C                                                                 |
| 1p2n   | D        | 85.728     | PANCREATIC TRYPsin INHIBITOR                                            |
| 1t7c   | D        | 87.2109    | PANCREATIC TRYPsin INHIBITOR                                            |
| 2tec   | I        | 90.9058    | EGLIN C                                                                 |
| 1cbw   | I        | 94.0398    | BPTI                                                                    |
| 1okx   | C        | 94.388     | SCYPTOLIN A, PEPTIDE: 1BO-ALA-THR-THR-LEU-SUJ-CNT-VAL                   |
| 1t8l   | B        | 94.4994    | PANCREATIC TRYPsin INHIBITOR                                            |
| 1mee   | I        | 97.0394    | EGLIN C                                                                 |
| 1t8l   | D        | 97.9103    | PANCREATIC TRYPsin INHIBITOR                                            |
| 2r9p   | G        | 97.9528    | PANCREATIC TRYPsin INHIBITOR                                            |
| 1y3f   | I        | 98.0841    | CHYMOTRYPsin INHIBITOR 2                                                |
| 1 sib  | I        | 98.8439    | EGLIN C                                                                 |
| 1p2q   | D        | 100.189    | PANCREATIC TRYPsin INHIBITOR                                            |
| 1 gl1  | J        | 100.913    | PROTEASE INHIBITOR LCMI II                                              |
| 1cgj   | I        | 101.458    | PANCREATIC SECRETORY TRYPsin INHIBITOR (KAZAL TYPE) VARIANT 4           |
| 1zr0   | D        | 101.485    | TISSUE FACTOR PATHWAY INHIBITOR 2                                       |
| 1 gl1  | I        | 103.915    | PROTEASE INHIBITOR LCMI II                                              |
| 1ca0   | I        | 104.424    | PROTEASE INHIBITOR DOMAIN OF ALZHEIMER'S AMYLOID BETA-PROTEIN PRECURSOR |
| 1t8m   | B        | 104.732    | PANCREATIC TRYPsin INHIBITOR                                            |
| 1fak   | I        | 105.915    | PROTEIN (5L15)                                                          |
| 1t8m   | D        | 109.152    | PANCREATIC TRYPsin INHIBITOR                                            |
| 1 slv  | A        | 109.709    | ECOTIN                                                                  |
| 2tgp   | I        | 110.175    | TRYPsin INHIBITOR                                                       |
| 1fy8   | I        | 111.249    | PANCREATIC TRYPsin INHIBITOR                                            |
| 1yaf   | A        | 111.568    | TRANSCRIPTIONAL ACTIVATOR TENA                                          |
| 1ejm   | B        | 112.112    | PANCREATIC TRYPsin INHIBITOR                                            |
| 1y4a   | I        | 113.068    | CHYMOTRYPsin INHIBITOR 2                                                |
| 1ca0   | D        | 114.457    | PROTEASE INHIBITOR DOMAIN OF ALZHEIMER'S AMYLOID BETA-PROTEIN PRECURSOR |
| 1tm3   | I        | 116.186    | CHYMOTRYPsin INHIBITOR 2                                                |
| 1eaw   | B        | 116.702    | PANCREATIC TRYPsin INHIBITOR                                            |
| 2buc   | C        | 116.952    | DIPEPTIDYL PEPTIDASE IV                                                 |
| 2fi3   | I        | 116.963    | PANCREATIC TRYPsin INHIBITOR                                            |
| 1oyv   | I        | 118.337    | WOUND-INDUCED PROTEINASE INHIBITOR-II                                   |
| 1n3t   | C        | 119.849    | GTP CYCLOHYDROLASE I                                                    |
| 2auz   | A        | 121.132    | CATHEPSIN K                                                             |
| 2ftm   | B        | 121.486    | PANCREATIC TRYPsin INHIBITOR                                            |
| 1mtn   | H        | 121.744    | BASIC PANCREATIC TRYPsin INHIBITOR                                      |
| 1lw6   | I        | 122.295    | SUBTILISIN-CHYMOTRYPsin INHIBITOR-2A                                    |
| 1yaf   | B        | 122.649    | TRANSCRIPTIONAL ACTIVATOR TENA                                          |
| 1ct2   | I        | 122.865    | OVOMUCOID INHIBITOR                                                     |
| 1tm7   | I        | 122.899    | CHYMOTRYPsin INHIBITOR 2                                                |
| 1zr0   | B        | 123.843    | TISSUE FACTOR PATHWAY INHIBITOR 2                                       |
| 1ejm   | D        | 124.116    | PANCREATIC TRYPsin INHIBITOR                                            |

The protein names are extracted from the metadata in the PDB files. The known alpha-chymotrypsin inhibitors are shown in bold.

Table S2. List of the top 20 hits from screening of uracil-DNA glycosylase inhibitors

| PDB ID | Chain ID | EPSS score     | Protein name annotation                           |
|--------|----------|----------------|---------------------------------------------------|
| 1udi   | I        | <b>0</b>       | <b>URACIL-DNA GLYCOSYLASE INHIBITOR PROTEIN</b>   |
| 1ugh   | I        | <b>32.1578</b> | <b>PROTEIN (URACIL-DNA GLYCOSYLASE INHIBITOR)</b> |
| 2uug   | C        | <b>33.8753</b> | <b>URACIL-DNA GLYCOSYLASE INHIBITOR</b>           |
| 1uug   | B        | <b>35.9908</b> | <b>URACIL-DNA GLYCOSYLASE INHIBITOR</b>           |
| 2j8x   | D        | <b>37.5866</b> | <b>URACIL-DNA GLYCOSYLASE INHIBITOR</b>           |
| 1lqm   | B        | <b>40.2354</b> | <b>URACIL-DNA GLYCOSYLASE INHIBITOR</b>           |
| 1lqg   | C        | <b>40.3106</b> | <b>URACIL-DNA GLYCOSYLASE INHIBITOR</b>           |
| 1eui   | D        | <b>41.3846</b> | <b>URACIL-DNA GLYCOSYLASE INHIBITOR PROTEIN</b>   |
| 1lqm   | F        | <b>43.6699</b> | <b>URACIL-DNA GLYCOSYLASE INHIBITOR</b>           |
| 1eui   | C        | <b>44.8587</b> | <b>URACIL-DNA GLYCOSYLASE INHIBITOR PROTEIN</b>   |
| 1uug   | D        | <b>45.2638</b> | <b>URACIL-DNA GLYCOSYLASE INHIBITOR</b>           |
| 2j8x   | B        | <b>45.3427</b> | <b>URACIL-DNA GLYCOSYLASE INHIBITOR</b>           |
| 2uug   | D        | <b>48.6658</b> | <b>URACIL-DNA GLYCOSYLASE INHIBITOR</b>           |
| 1lqg   | D        | <b>51.274i</b> | <b>URACIL-DNA GLYCOSYLASE INHIBITOR</b>           |
| 1lqm   | D        | <b>58.8174</b> | <b>URACIL-DNA GLYCOSYLASE INHIBITOR</b>           |
| 1lqm   | H        | <b>58.9295</b> | <b>URACIL-DNA GLYCOSYLASE INHIBITOR</b>           |
| 1yvf   | A        | 72.5829        | HCV NS5B POLYMERASE                               |
| 2 h7c  | C        | 73.6482        | LIVER CARBOXYLESTERASE 1                          |
| 1znj   | K        | 91.3319        | INSULIN                                           |
| 2e7l   | A        | 92.1639        | T CELL RECEPTOR ALPHA CHAIN                       |

The protein names are extracted from the metadata in the PDB files. The known uracil-DNA glycosylase inhibitors are shown in bold.

Table S3. List of top 50 hits from screening of estrogen receptor

| PDB ID | Chain ID | EPSS Score | Protein name annotation                              |
|--------|----------|------------|------------------------------------------------------|
| 1qkn   | A        | 0          | ESTROGEN RECEPTOR BETA                               |
| 1hj1   | A        | 39.7703    | ESTROGEN RECEPTOR BETA                               |
| 2ayr   | A        | 40.4564    | ESTROGEN RECEPTOR                                    |
| 1xp1   | A        | 42.8517    | ESTROGEN RECEPTOR                                    |
| 1yim   | A        | 43.1529    | ESTROGEN RECEPTOR                                    |
| 2bj4   | B        | 43.7577    | ESTROGEN RECEPTOR ALPHA                              |
| 1xp9   | A        | 44.2426    | ESTROGEN RECEPTOR                                    |
| 2jf9   | A        | 44.9503    | ESTROGEN RECEPTOR                                    |
| 1xp6   | A        | 45.4521    | ESTROGEN RECEPTOR                                    |
| 1xpc   | A        | 45.7676    | ESTROGEN RECEPTOR                                    |
| 2ouz   | A        | 46.361     | ESTROGEN RECEPTOR                                    |
| 1gz7   | A        | 47.0982    | LIPASE 2                                             |
| 1o0s   | B        | 48.393     | NAD-DEPENDENT MALIC ENZYME                           |
| 2jfa   | A        | 50.4815    | ESTROGEN RECEPTOR                                    |
| 1a2z   | B        | 50.6728    | PYRROLIDONE CARBOXYL PEPTIDASE                       |
| 2q70   | A        | 50.7383    | ESTROGEN RECEPTOR                                    |
| 1n23   | B        | 51.1064    | (+)-BORNYL DIPHOSPHATE SYNTHASE                      |
| 2gpu   | A        | 52.059     | ESTROGEN-RELATED RECEPTOR GAMMA                      |
| 1a52   | B        | 55.9095    | ESTROGEN RECEPTOR                                    |
| 1lpm   | A        | 56.2002    | LIPASE                                               |
| 1r5k   | B        | 56.6413    | ESTROGEN RECEPTOR                                    |
| 1gz7   | D        | 57.0936    | LIPASE 2                                             |
| 1e1f   | A        | 57.7041    | BETA-GLUCOSIDASE                                     |
| 1llq   | B        | 57.9091    | NAD-DEPENDENT MALIC ENZYME                           |
| 1bpq   | A        | 58.3395    | PHOSPHOLIPASE A2                                     |
| 2cjf   | C        | 58.9727    | 3-DEHYDROQUINATE DEHYDRATASE                         |
| 2fsz   | B        | 59.053     | ESTROGEN RECEPTOR BETA                               |
| 1e1e   | B        | 60.0215    | BETA-GLUCOSIDASE                                     |
| 2jfa   | B        | 60.0931    | ESTROGEN RECEPTOR                                    |
| 1ker   | A        | 60.7205    | DTDP-D-GLUCOSE 4,6-DEHYDRATASE                       |
| 1err   | B        | 60.8233    | ESTROGEN RECEPTOR                                    |
| 1r5k   | C        | 61.008     | ESTROGEN RECEPTOR                                    |
| 2qgv   | H        | 61.3767    | HYDROGENASE-1 OPERON PROTEIN HYAE                    |
| 2i0j   | B        | 61.8803    | ESTROGEN RECEPTOR ALPHA                              |
| 1yb4   | A        | 62.6156    | TARTRONIC SEMIALDEHYDE REDUCTASE                     |
| 2qe4   | B        | 62.8829    | ESTROGEN RECEPTOR                                    |
| 2dhz   | A        | 63.5922    | RAP GUANINE NUCLEOTIDE EXCHANGE FACTOR (GEF)- LIKE 1 |
| 2pgj   | B        | 64.7522    | ADP-RIBOSYL CYCLASE 1                                |
| 1gkq   | D        | 65.4463    | HYDANTOINASE                                         |
| 1xot   | A        | 65.7045    | CAMP-SPECIFIC 3',5'-CYCLIC PHOSPHODIESTERASE 4B      |
| 1tb7   | B        | 65.8592    | CAMP-SPECIFIC 3',5'-CYCLIC PHOSPHODIESTERASE 4D      |
| 1h27   | C        | 65.9094    | CELL DIVISION PROTEIN KINASE 2                       |
| 2gkl   | A        | 65.9506    | BETA-LACTAMASE                                       |
| 1wmk   | A        | 66.0729    | DEATH-ASSOCIATED PROTEIN KINASE 2                    |
| 2hqa   | A        | 67.211     | DNA POLYMERASE III ALPHA SUBUNIT                     |
| 1yin   | A        | 67.4511    | ESTROGEN RECEPTOR                                    |
| 1gow   | B        | 67.836     | BETA-GLYCOSIDASE                                     |
| 2jf9   | C        | 67.8658    | ESTROGEN RECEPTOR                                    |
| 2pmb   | A        | 68.0196    | UNCHARACTERIZED PROTEIN                              |
| 1a52   | A        | 68.2207    | ESTROGEN RECEPTOR                                    |

Protein names are extracted from the metadata in the PDB files. Known estrogen receptors are shown in bold. The query structure (PDB ID: 1qkn) is shown as a trivial hit from the screening.

Table S4. List of top 50 hits from screening of cyclin-dependent kinase 2

| PDB ID | Chain ID | EPSS Score | Protein Name Annotation                     |
|--------|----------|------------|---------------------------------------------|
| 1di8   | A        | 0          | CYCLIN-DEPENDENT KINASE 2                   |
| 1oiy   | C        | 38.161     | CELL DIVISION PROTEIN KINASE 2              |
| 2iw8   | C        | 40.3031    | CELL DIVISION PROTEIN KINASE 2              |
| 1aq1   | A        | 45.0125    | CYCLIN-DEPENDENT PROTEIN KINASE 2           |
| 1fvt   | A        | 45.8081    | CELL DIVISION PROTEIN KINASE 2              |
| 1oi9   | C        | 47.3152    | CELL DIVISION PROTEIN KINASE 2              |
| 1ke9   | A        | 47.4172    | CELL DIVISION PROTEIN KINASE 2              |
| 2uue   | C        | 49.434     | CELL DIVISION PROTEIN KINASE 2              |
| 1ogu   | A        | 50.5897    | CELL DIVISION PROTEIN KINASE 2              |
| 2i40   | C        | 50.876     | CELL DIVISION PROTEIN KINASE 2              |
| 1ckp   | A        | 51.0618    | PROTEIN (CYCLIN-DEPENDENT PROTEIN KINASE 2) |
| 1 h1p  | A        | 52.4423    | CELL DIVISION PROTEIN KINASE 2              |
| 1e9 h  | C        | 52.4473    | CELL DIVISION PROTEIN KINASE 2              |
| 1 h1q  | C        | 53.0548    | CELL DIVISION PROTEIN KINASE 2              |
| 1oiu   | C        | 53.4459    | CELL DIVISION PROTEIN KINASE 2              |
| 1v1k   | A        | 54.7113    | CELL DIVISION PROTEIN KINASE 2              |
| 1ke8   | A        | 54.8103    | CELL DIVISION PROTEIN KINASE 2              |
| 1ogu   | C        | 54.9141    | CELL DIVISION PROTEIN KINASE 2              |
| 2uzl   | C        | 54.9601    | CELL DIVISION PROTEIN KINASE 2              |
| 1oi9   | A        | 55.2998    | CELL DIVISION PROTEIN KINASE 2              |
| 2c5n   | A        | 55.776     | CELL DIVISION PROTEIN KINASE 2              |
| 2iw6   | C        | 56.7318    | CELL DIVISION PROTEIN KINASE 2              |
| 2uzl   | A        | 57.4596    | CELL DIVISION PROTEIN KINASE 2              |
| 2iw6   | A        | 57.5462    | CELL DIVISION PROTEIN KINASE 2              |
| 2c5o   | A        | 58.147     | CELL DIVISION PROTEIN KINASE 2              |
| 1 h26  | C        | 58.9842    | CELL DIVISION PROTEIN KINASE 2              |
| 2iw9   | C        | 59.5102    | CELL DIVISION PROTEIN KINASE 2              |
| 2c4 g  | C        | 60.2306    | CELL DIVISION PROTEIN KINASE 2              |
| 2iw8   | A        | 61.1751    | CELL DIVISION PROTEIN KINASE 2              |
| 1vyw   | A        | 62.3481    | CELL DIVISION PROTEIN KINASE 2              |
| 1 h1r  | C        | 62.4581    | CELL DIVISION PROTEIN KINASE 2              |
| 1o12   | C        | 62.9078    | CELL DIVISION PROTEIN KINASE 2              |
| 1e9 h  | A        | 63.2369    | CELL DIVISION PROTEIN KINASE 2              |
| 2iw9   | A        | 63.2699    | CELL DIVISION PROTEIN KINASE 2              |
| 2duv   | A        | 63.8217    | CELL DIVISION PROTEIN KINASE 2              |
| 1oiu   | A        | 64.1929    | CELL DIVISION PROTEIN KINASE 2              |
| 2uzd   | A        | 65.0139    | CELL DIVISION PROTEIN KINASE 2              |
| 2b52   | A        | 65.4456    | CELL DIVISION PROTEIN KINASE 2              |
| 1ykr   | A        | 65.5259    | CELL DIVISION PROTEIN KINASE 2              |
| 2c5n   | C        | 65.5853    | CELL DIVISION PROTEIN KINASE 2              |
| 1oiy   | A        | 66.3882    | CELL DIVISION PROTEIN KINASE 2              |
| 1oir   | A        | 67.0979    | CELL DIVISION PROTEIN KINASE 2              |
| 2uzb   | A        | 68.0866    | CELL DIVISION PROTEIN KINASE 2              |
| 1 sm2  | B        | 68.2988    | TYROSINE-PROTEIN KINASE ITK/TSK             |
| 2f2c   | B        | 68.741     | CELL DIVISION PROTEIN KINASE 6              |
| 2uze   | C        | 69.5631    | CELL DIVISION PROTEIN KINASE 2              |
| 2cch   | A        | 69.8073    | CELL DIVISION PROTEIN KINASE 2              |
| 1 h07  | A        | 70.6655    | CELL DIVISION PROTEIN KINASE 2              |
| 2uzn   | A        | 71.8319    | CELL DIVISION PROTEIN KINASE 2              |
| 2oib   | A        | 72.0989    | INTERLEUKIN-1 RECEPTOR-ASSOCIATED KINASE 4  |

Protein names are extracted from the metadata in the PDB files. Known cyclin-dependent kinase 2 proteins are shown in bold. The query structure (PDBID: 1di8) is also shown as the top trivial hit from the screening.



| PDB ID  | Rank   | EPSS    | PDB ID  | Rank    | EPSS    |
|---------|--------|---------|---------|---------|---------|
| 1ct0-I  | 2,806  | 247.095 | 1jxc-A  | 46,642  | 388.182 |
| 1aap-A  | 2,964  | 249.067 | 1pit-A  | 49,019  | 392.499 |
| 2 sgp-I | 3,439  | 254.406 | 2 hex-C | 49,304  | 392.935 |
| 1ypa-I  | 3,633  | 256.52  | 1pbi-B  | 51,046  | 396.051 |
| 1ciq-A  | 3,693  | 257.069 | 2ovo-A  | 51,236  | 396.381 |
| 1ovo-D  | 4,255  | 262.148 | 1ecz-A  | 51,460  | 396.823 |
| 1ypc-I  | 4,809  | 266.628 | 1aal-A  | 51,676  | 397.196 |
| 1eaw-D  | 4,839  | 266.92  | 1egl-A  | 53,792  | 401.041 |
| 1 sgp-I | 5,138  | 269.356 | 1b0c-D  | 54,968  | 403.215 |
| 1bpi-A  | 5,169  | 269.628 | 1qlq-A  | 56,912  | 406.779 |
| 1ovo-C  | 6,281  | 277.476 | 2wbc-A  | 58,238  | 409.197 |
| 1xx9-D  | 6,491  | 278.858 | 1aal-B  | 58,239  | 409.198 |
| 1uub-A  | 6,920  | 281.466 | 1ecz-B  | 58,717  | 410.073 |
| 1cq4-A  | 8,295  | 289.119 | 2 hex-D | 62,502  | 417.083 |
| 1azz-D  | 8,485  | 290.153 | 1bi6-L  | 62,612  | 417.295 |
| 1k6u-A  | 9,529  | 295.358 | 1ovo-B  | 65,927  | 423.58  |
| 2iln-I  | 9,909  | 297.009 | 2bi6-H  | 65,971  | 423.672 |
| 2nu3-I  | 10,631 | 300.095 | 1 hx2-A | 66,246  | 424.17  |
| 1eai-C  | 11,611 | 304.113 | 1fi8-E  | 71,220  | 434.226 |
| 1 sqq-I | 13,676 | 311.749 | 1k9b-A  | 74,305  | 440.566 |
| 1iy6-A  | 14,442 | 314.52  | 1fyb-A  | 75,490  | 443.183 |
| 1b0c-E  | 17,265 | 323.481 | 1kio-A  | 75,806  | 443.858 |
| 1bhc-A  | 17,560 | 324.462 | 1xxd-C  | 76,048  | 444.341 |
| 1b0c-B  | 19,938 | 331.195 | 1m8c-A  | 76,301  | 444.915 |
| 1bhc-H  | 20,741 | 333.396 | 1eyl-A  | 76,652  | 445.619 |
| 1bz5-E  | 21,168 | 334.397 | 2fj8-A  | 79,477  | 452.163 |
| 1bhc-G  | 21,854 | 336.156 | 1pi2-A  | 81,823  | 457.96  |
| 1bhc-C  | 21,931 | 336.374 | 1tih-A  | 83,799  | 463.158 |
| 1bz5-C  | 22,362 | 337.477 | 1fmz-A  | 83,974  | 463.599 |
| 1bhc-B  | 22,703 | 338.343 | 1d0d-B  | 84,576  | 465.149 |
| 1jv9-A  | 23,407 | 340.067 | 1ezu-B  | 85,829  | 468.656 |
| 1b0c-A  | 23,923 | 341.324 | 1b0c-C  | 86,655  | 470.977 |
| 2 hex-A | 24,298 | 342.223 | 1pbi-A  | 87,142  | 472.482 |
| 1fan-A  | 24,336 | 342.315 | 1uua-A  | 88,395  | 476.216 |
| 1bbi-A  | 25,297 | 344.66  | 2 hex-E | 89,222  | 478.883 |
| 1tur-A  | 25,430 | 344.933 | 1aap-B  | 90,714  | 483.926 |
| 1bhc-D  | 25,937 | 346.167 | 1xxd-D  | 91,135  | 485.405 |
| 1p2i-I  | 26,142 | 346.638 | 1jv8-A  | 92,282  | 489.827 |
| 1bhc-E  | 26,883 | 348.343 | 1fi8-C  | 93,004  | 492.688 |
| 1wo9-A  | 26,950 | 348.5   | 1cir-A  | 93,403  | 494.445 |
| 1bi6-H  | 27,180 | 349.016 | 2bi6-L  | 93,895  | 496.461 |
| 1df9-C  | 27,267 | 349.213 | 1kj0-A  | 95,633  | 504.173 |
| 1omt-A  | 27,543 | 349.859 | 1egp-A  | 96,013  | 505.927 |
| 1bhc-J  | 27,933 | 350.771 | 1p2k-I  | 97,009  | 510.801 |
| 1coa-I  | 28,156 | 351.327 | 1d6r-I  | 97,424  | 513.188 |
| 2ci2-I  | 28,309 | 351.66  | 1tus-A  | 97,707  | 514.732 |
| 1c2a-A  | 29,016 | 353.229 | 1bz5-D  | 97,973  | 516.344 |
| 1ecy-A  | 30,366 | 356.18  | 1wbc-A  | 99,985  | 529.412 |
| 2ftm-A  | 30,613 | 356.687 | 1kgm-A  | 105,325 | 605.445 |
| 1ovo-A  | 32,038 | 359.659 | 1pmc-A  | 105,615 | 615.192 |
| 1bz5-B  | 32,717 | 361.001 |         |         |         |
| 1mvz-A  | 32,882 | 361.365 |         |         |         |
| 1bhc-I  | 34,710 | 365.16  |         |         |         |
| 1bti-A  | 35,000 | 365.774 |         |         |         |
| 1bhc-F  | 37,015 | 369.829 |         |         |         |
| 1fn0-A  | 37,047 | 369.868 |         |         |         |
| 1qh2-B  | 38,489 | 372.79  |         |         |         |
| 1ifg-A  | 39,667 | 374.957 |         |         |         |
| 2 hex-B | 39,891 | 375.369 |         |         |         |
| 2bbi-A  | 42,172 | 379.75  |         |         |         |
| 1zjd-B  | 43,153 | 381.665 |         |         |         |
| 1eai-D  | 44,552 | 384.275 |         |         |         |
| 1bz5-A  | 45,509 | 386.073 |         |         |         |
| 1ccv-A  | 45,660 | 386.344 |         |         |         |
| 1m8b-A  | 46,122 | 387.238 |         |         |         |



**Table S6. Ranking and scoring of the 26 selected uracil-DNA glycosylase inhibitors during screening of the PDB**

| PDB ID | RANK   | EPSS    |
|--------|--------|---------|
| 1udi-I | 1      | 0       |
| 1ugh-I | 2      | 32.1578 |
| 2uug-C | 3      | 33.8753 |
| 1uug-B | 4      | 35.9908 |
| 2j8x-D | 5      | 37.5866 |
| 1lqm-B | 6      | 40.2354 |
| 1lqg-C | 7      | 40.3106 |
| 1eui-D | 8      | 41.3846 |
| 1lqm-F | 9      | 43.6699 |
| 1eui-C | 10     | 44.8587 |
| 1uug-D | 11     | 45.2638 |
| 2j8x-B | 12     | 45.3427 |
| 2uug-D | 13     | 48.6658 |
| 1lqg-D | 14     | 51.274  |
| 1lqm-D | 15     | 58.8174 |
| 1lqm-H | 16     | 58.9295 |
| 1ugi-A | 9,432  | 214.758 |
| 2ugi-B | 16,532 | 236.823 |
| 1ugi-D | 17,085 | 238.319 |
| 1ugi-C | 17,877 | 240.364 |
| 1ugi-F | 19,343 | 244.09  |
| 1ugi-G | 46,704 | 302.665 |
| 1ugi-E | 74,234 | 361.319 |
| 1ugi-H | 78,997 | 374.152 |
| 2ugi-A | 85,958 | 395.591 |
| 1ugi-B | 89,364 | 408.298 |
